# Supplementary material for: Toxicological Evaluation of SiO2 Nanoparticles by Zebrafish Embryo Toxicity Test
Source: PubMed Central journal article supplement (PMC6413002; doi:10.3390/ijms20040882), 2019-02-18
Supplement: ijms-20-00882-s001.pdf [file ijms-20-00882-s001.pdf]

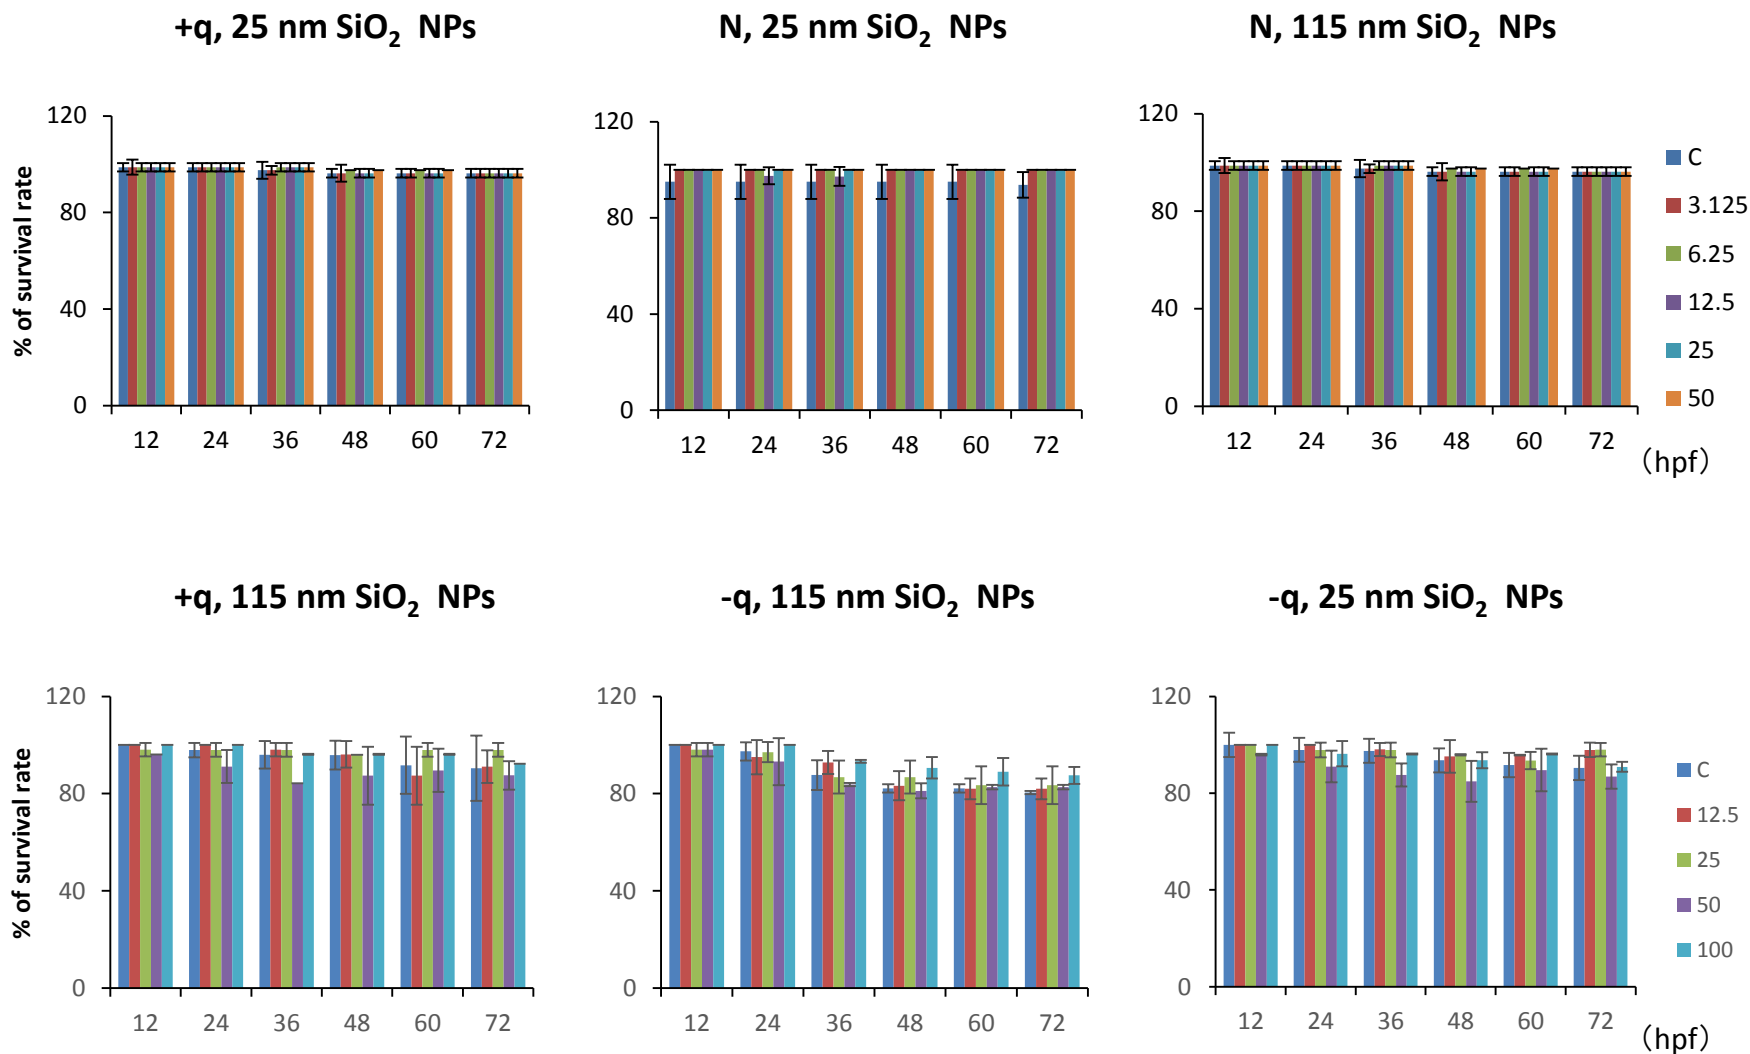

**Figure S1.** Survival rate at each time point of 12, 24, 36, 48, 60, and 72 hpf after exposure to 3.125, 6.25, 12.5, 25, 50, and 100 mg/L of 25- or 115-nm SiO<sub>2</sub> NPs with different surface charges. Data are represented as mean  $\pm$  SD (standard deviation).

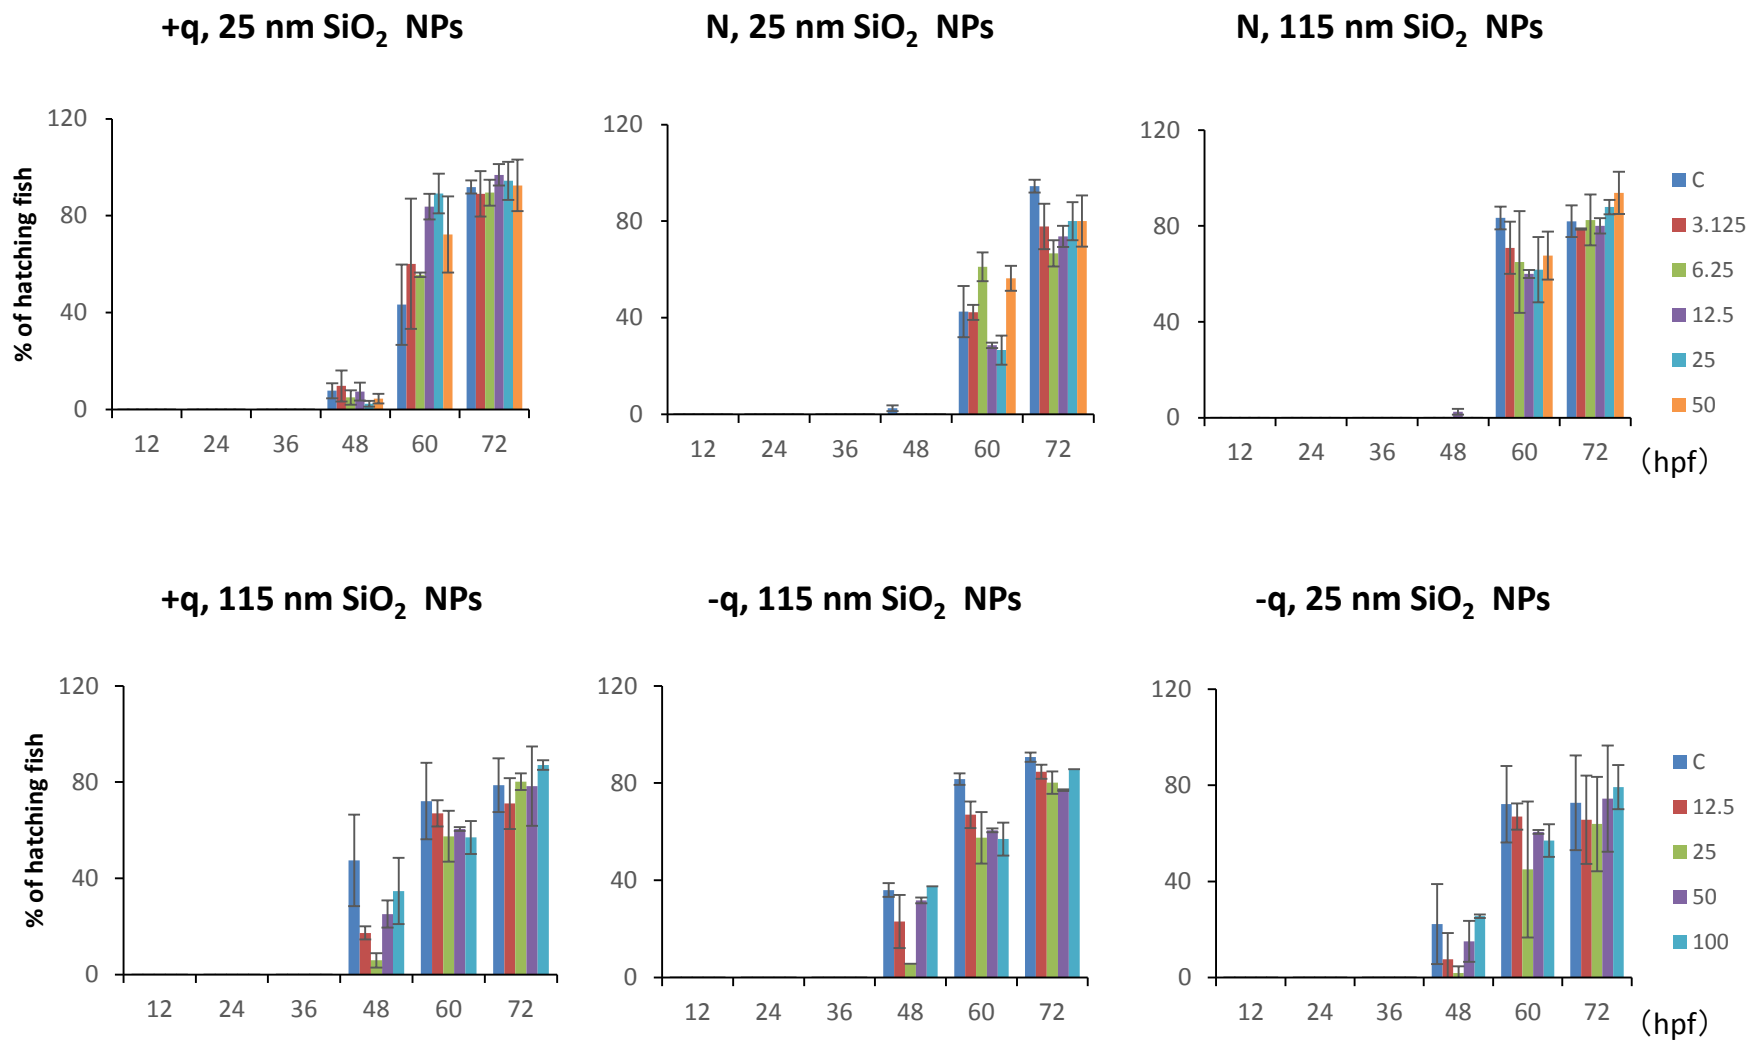

**Figure S2.** Hatching rate at each time point of 12, 24, 36, 48, 60, and 72 hpf after exposure to 3.125, 6.25, 12.5, 25, 50, and 100 mg/L of 25- or 115-nm SiO<sub>2</sub> NPs with different surface charges. Data are represented as mean  $\pm$  SD (standard deviation).
